# Supplementary material for: IF1 ablation prevents ATP synthase oligomerization, enhances mitochondrial ATP turnover and promotes an adenosine-mediated pro-inflammatory phenotype
Source: PubMed Central journal article supplement (PMC10336053; doi:10.1038/s41419-023-05957-z), 2023-07-12

g

### Supplemental Material to Fig 2g (original blots)

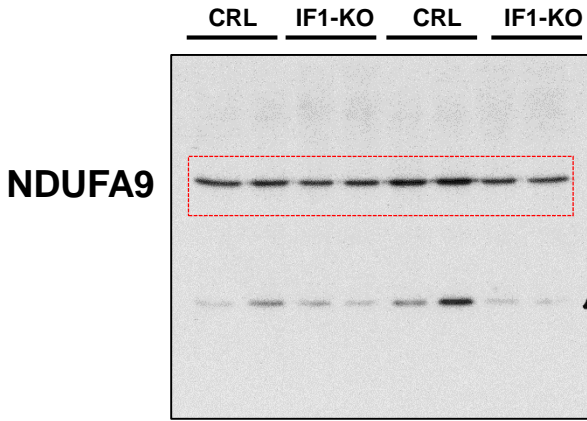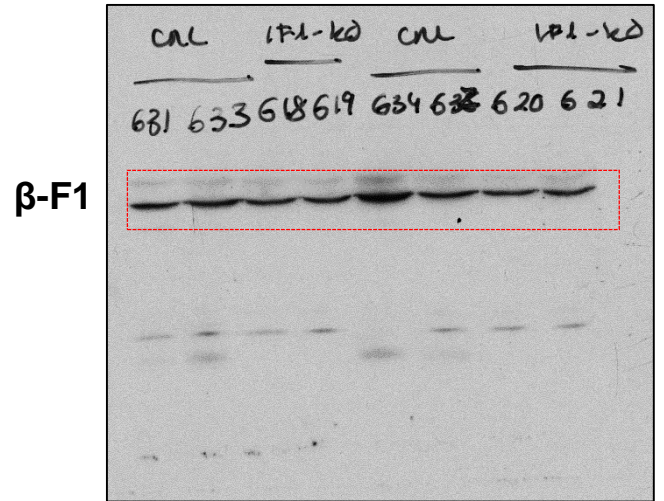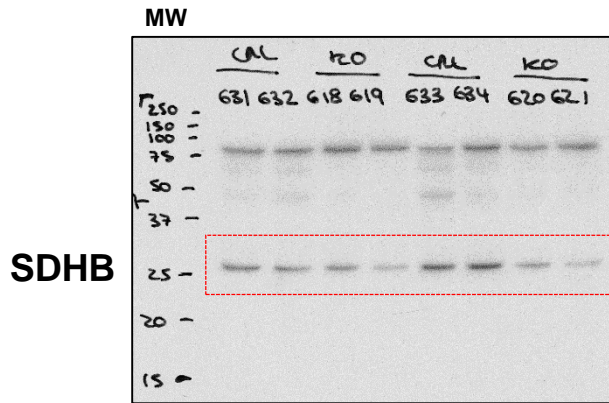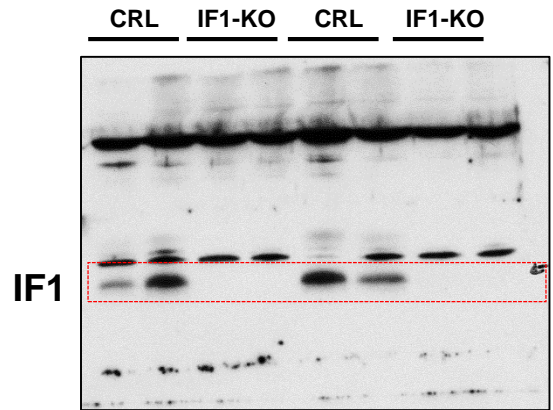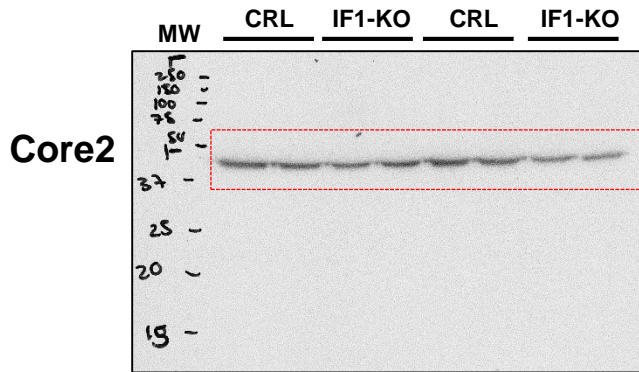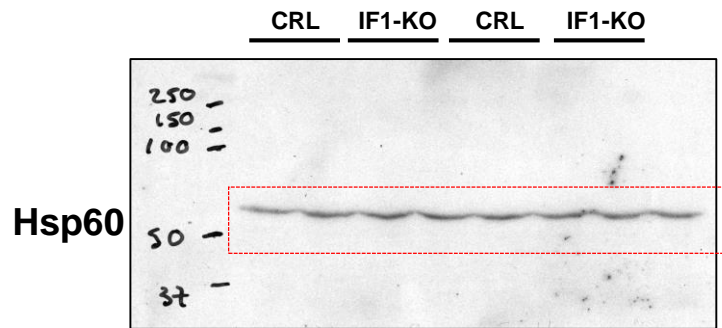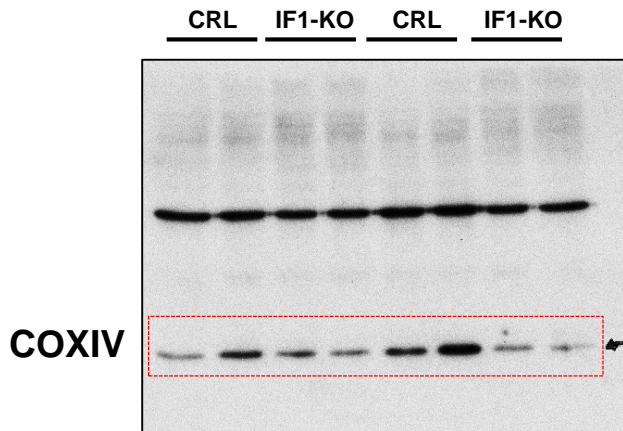

# Supplemental Material to Fig 3c (original blots)

**C**

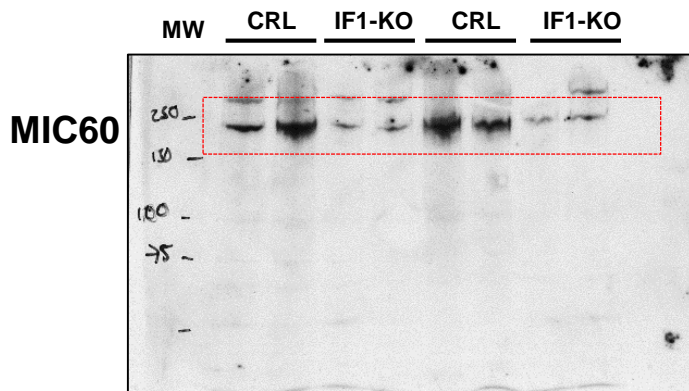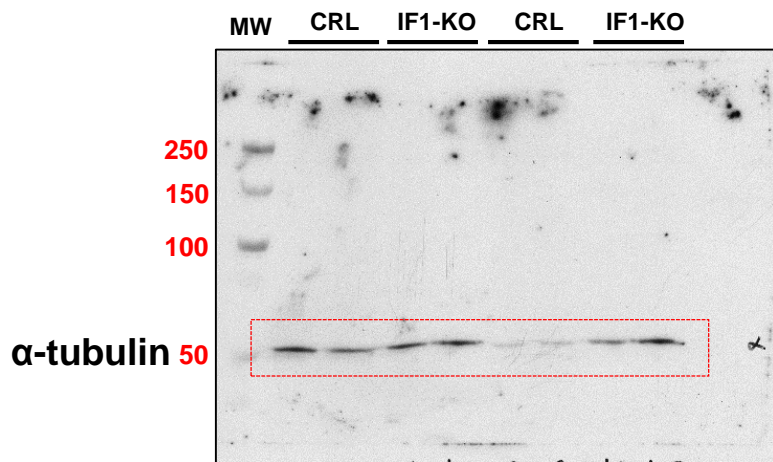

# Supplemental Material to Fig 4k (original blots)

k

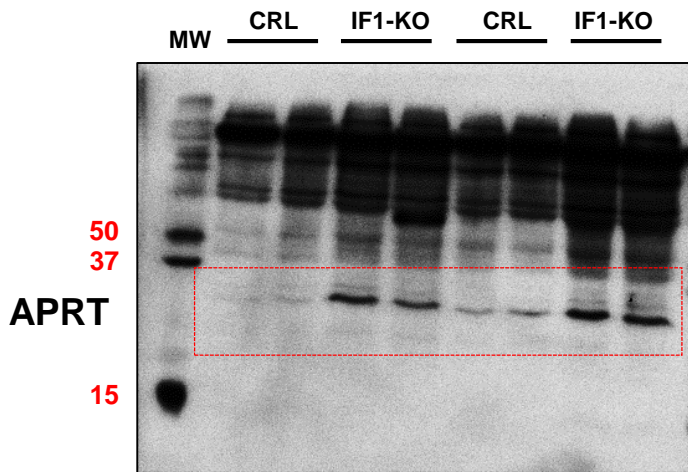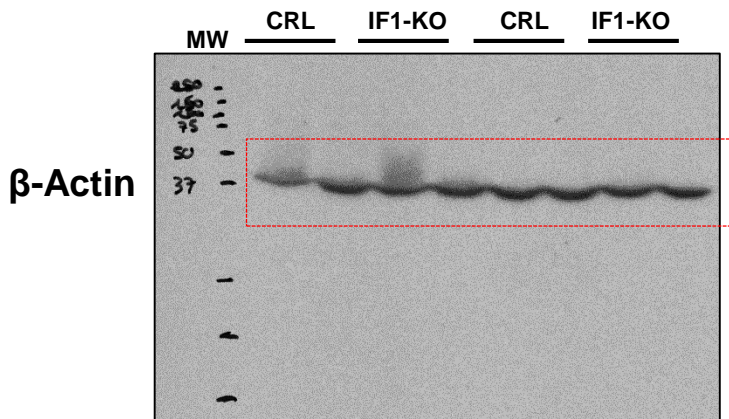

# Supplemental Material to Fig 5a, i (original blots)

a

CT26

MW wt N.T. IF1-KO

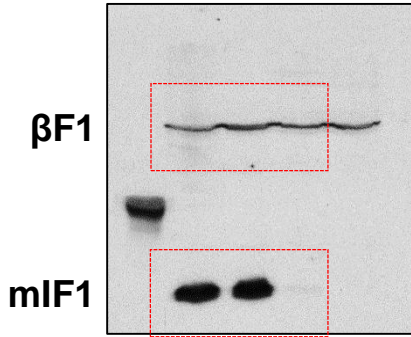

MC38

wt N.T. IF1-KO

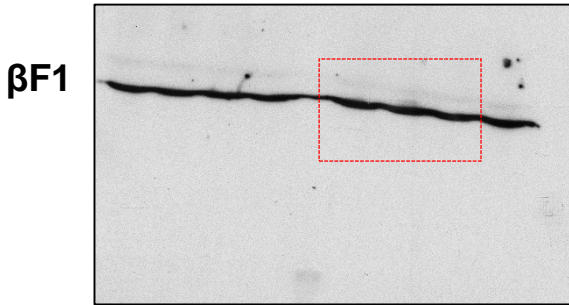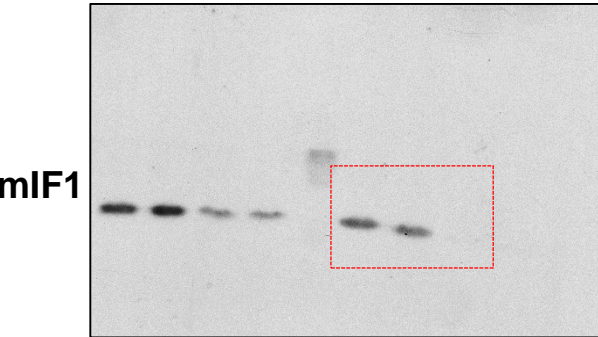

i

APRT

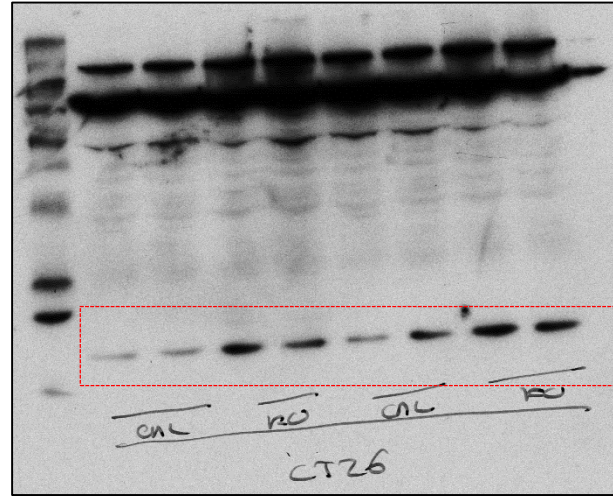

$\beta$ -Actin

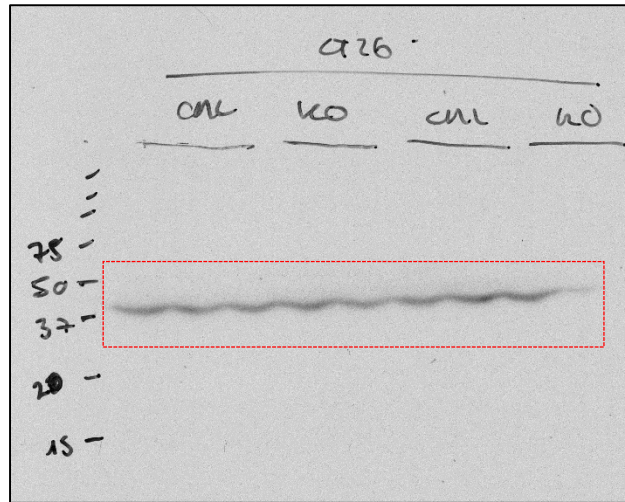

Supplemental Material to Supplemental Fig S1b-c (original blots)

b

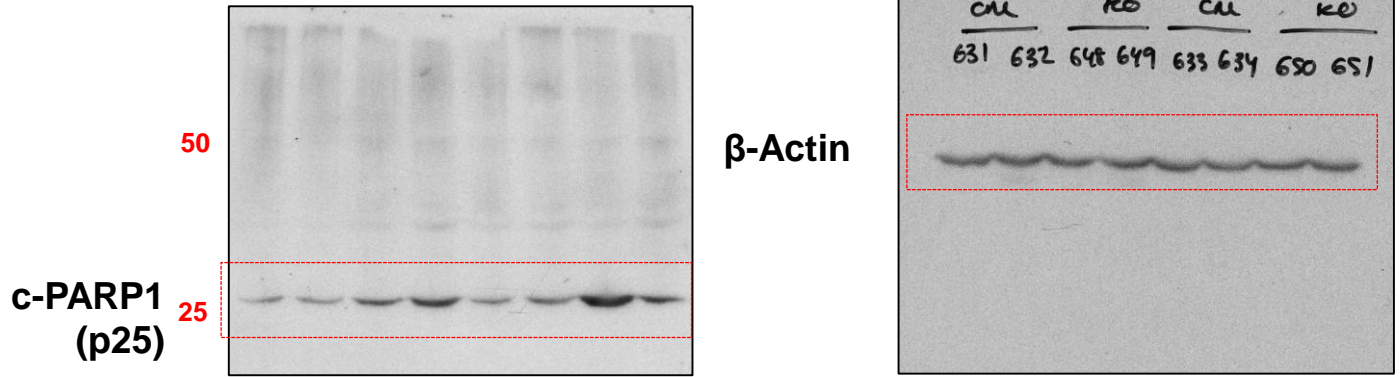

c

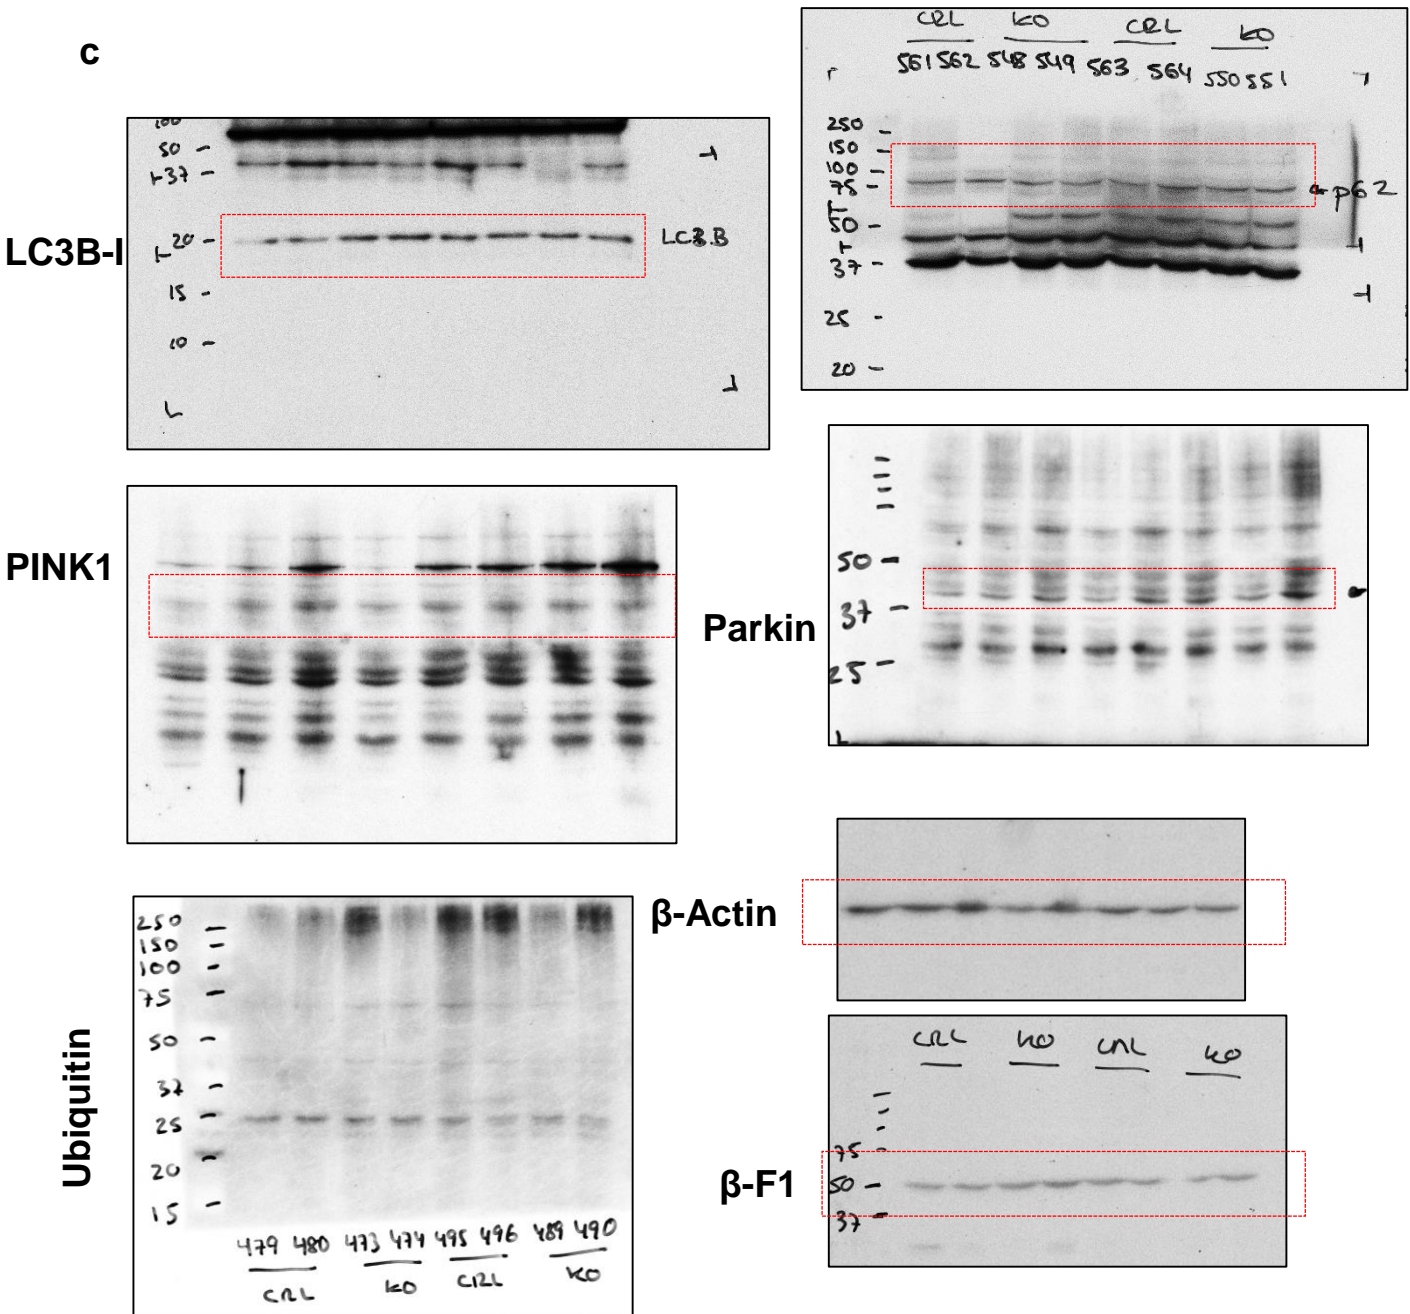

Supplemental Material to Supplemental Fig S1f (original blots)

f

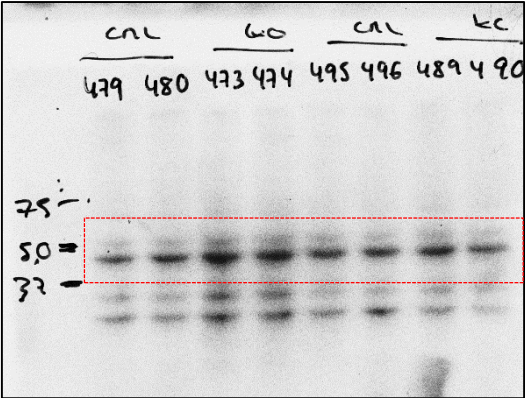

YMEL1

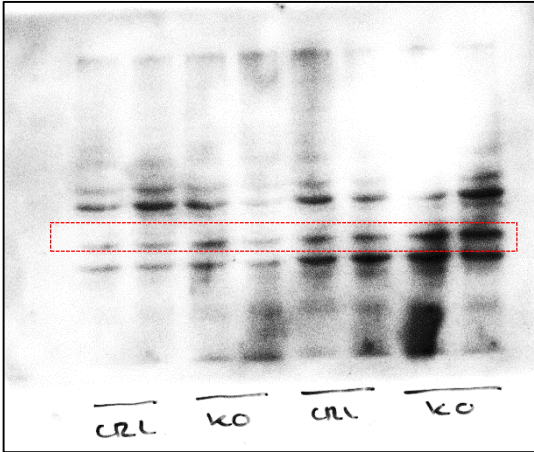

OMI

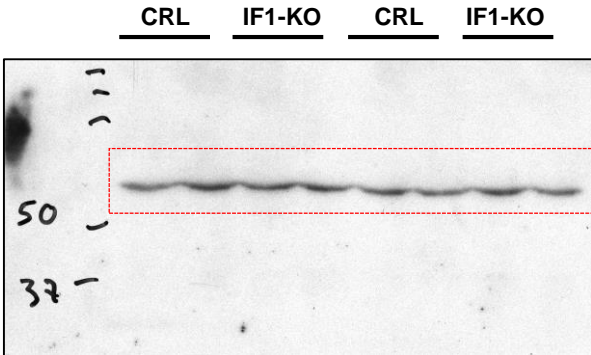

Hsp60

# Supplemental Material to Supplemental Fig S2b-c (original blots)

**b**

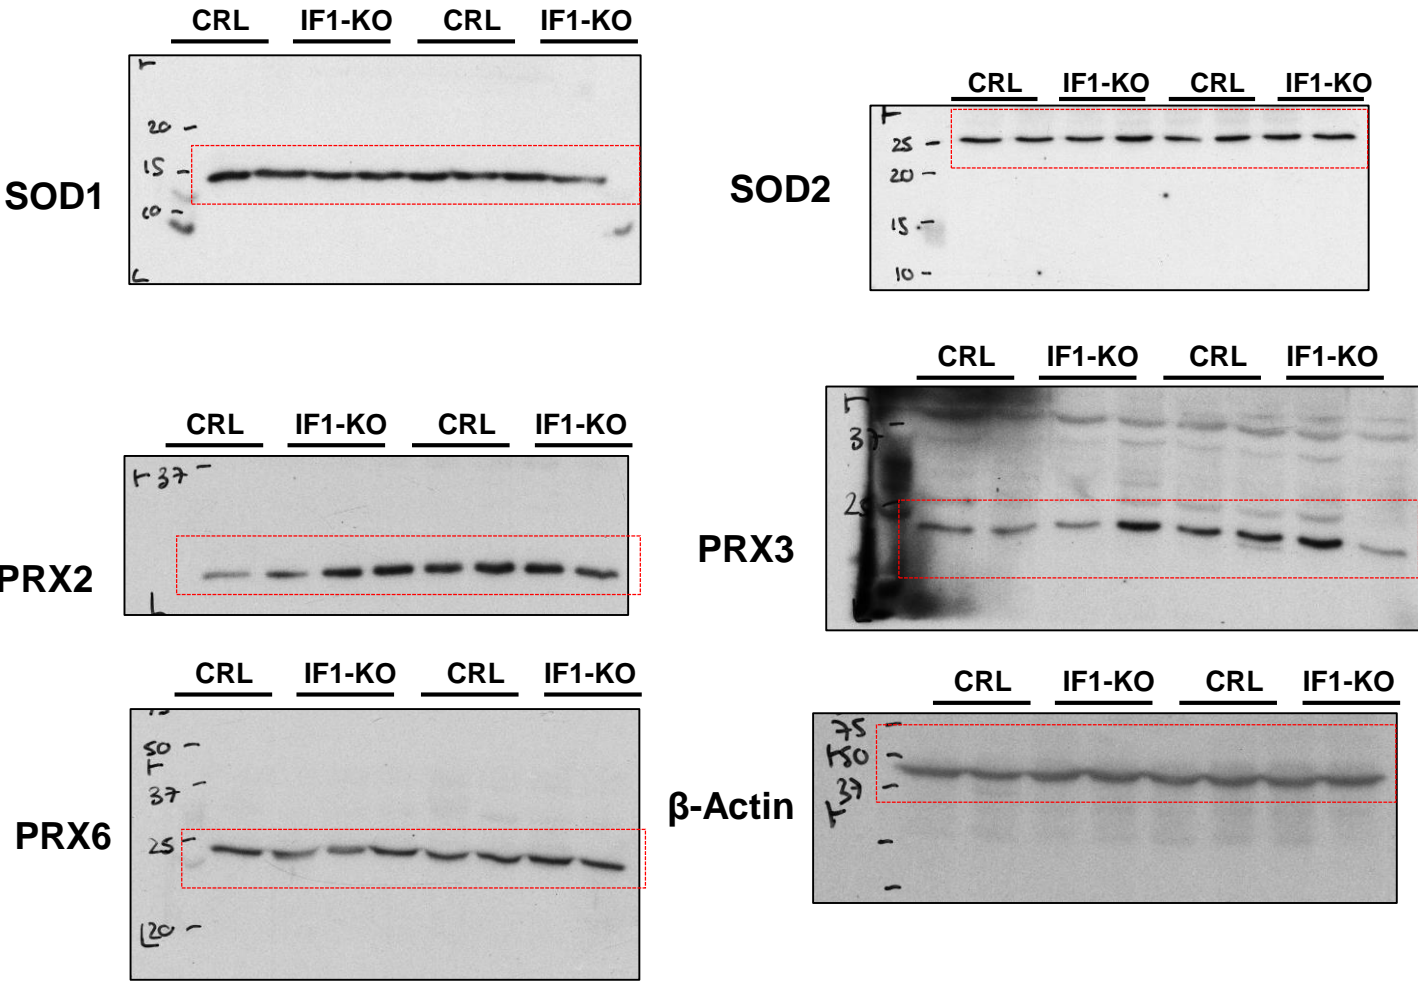

**c**

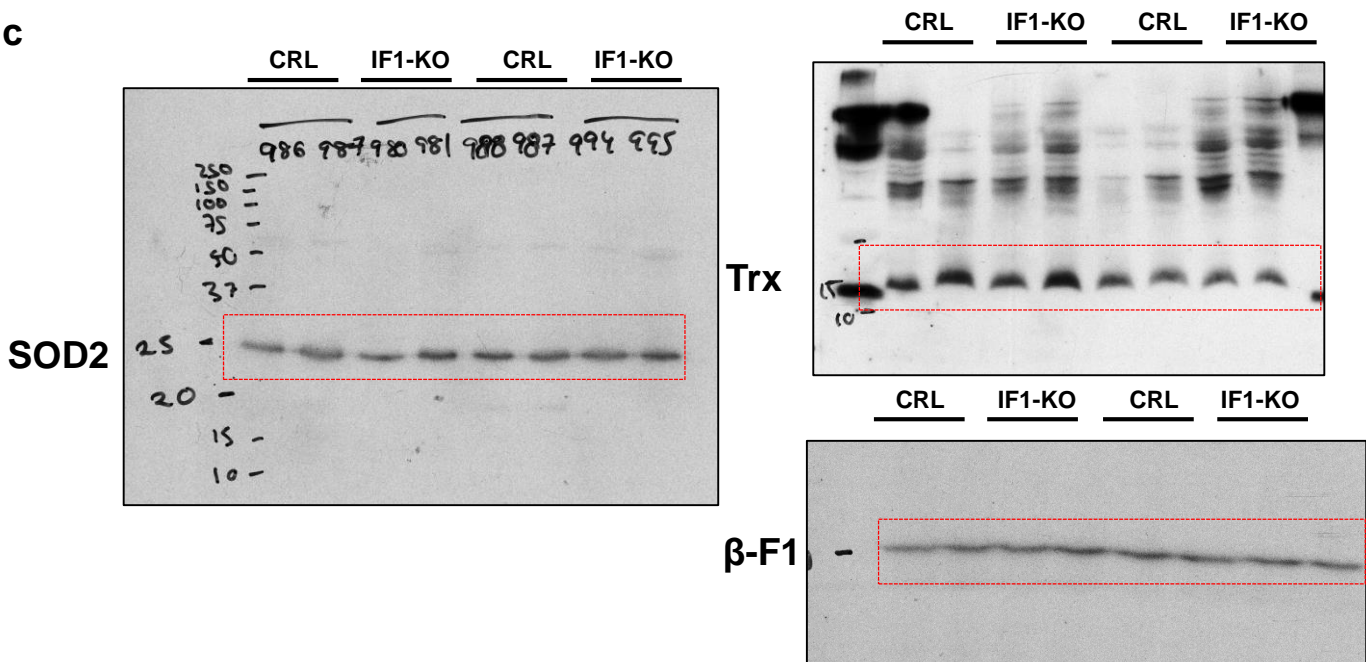



Supplemental Material to Supplemental Fig S2e-f (original blots)

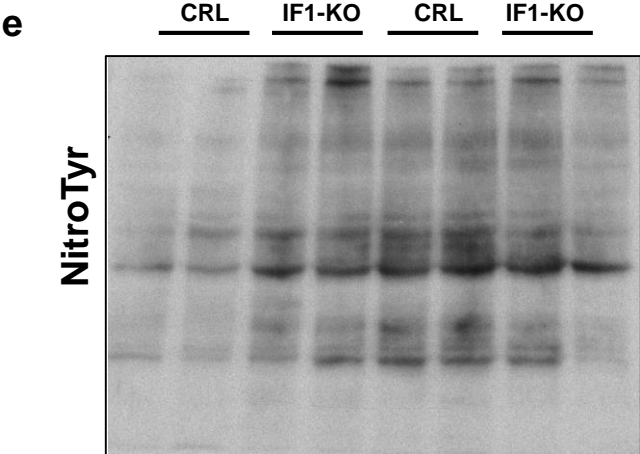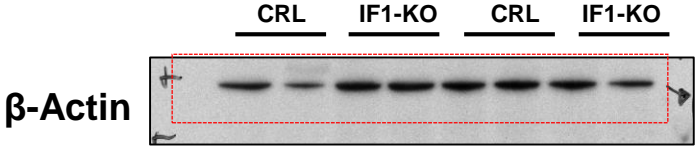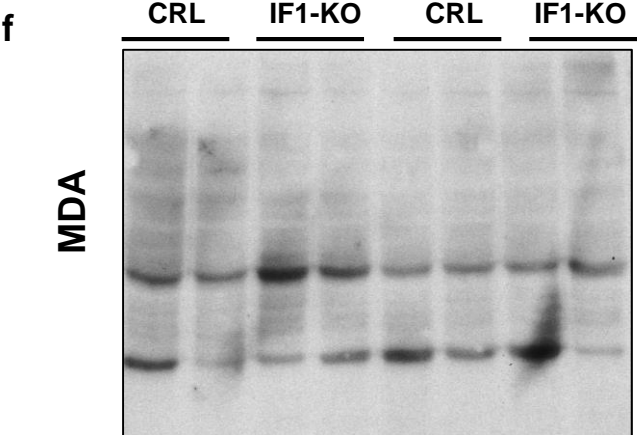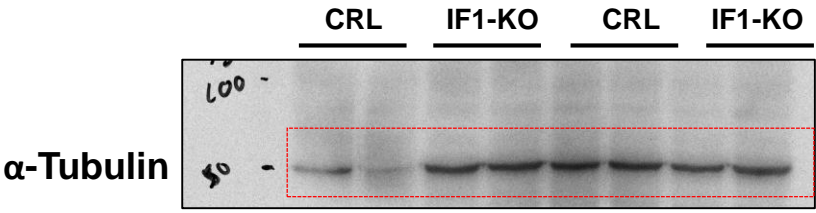

Supplemental Material to Supplemental Fig S3f-g (original blots)

f

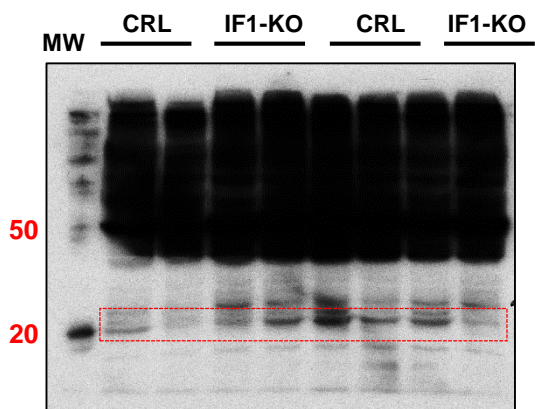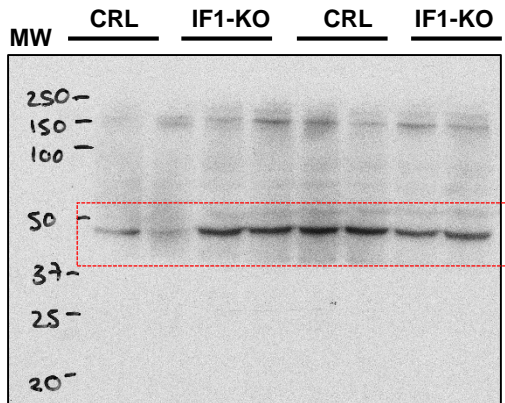

g

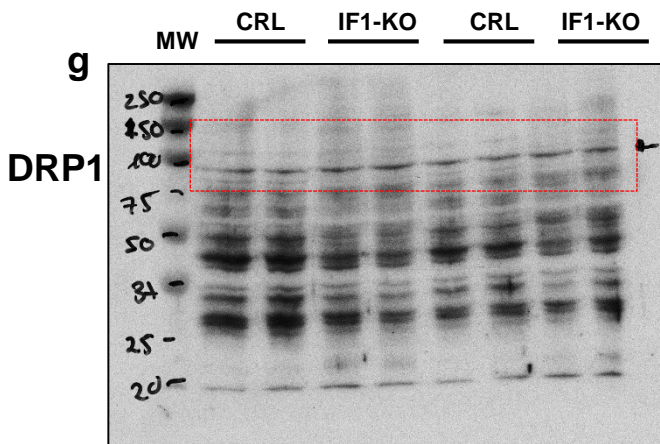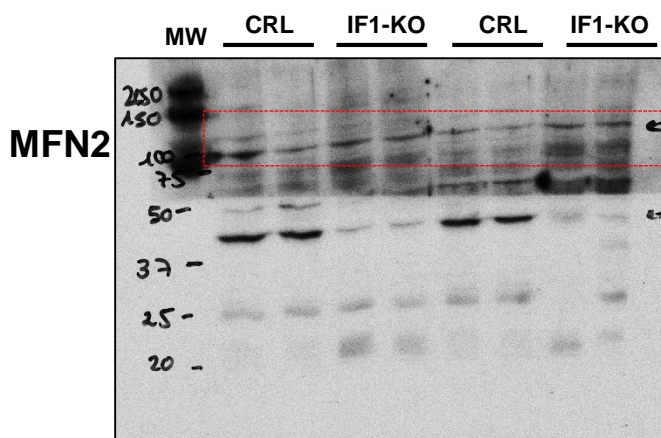

OPA1

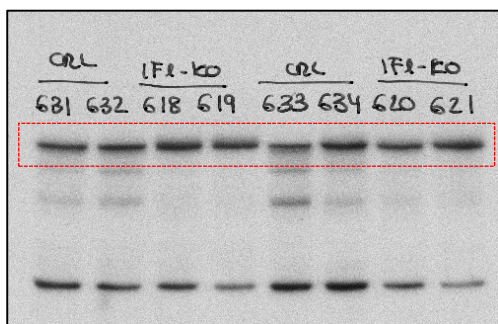

CRL IF1-KO CRL IF1-KO

Hsp60

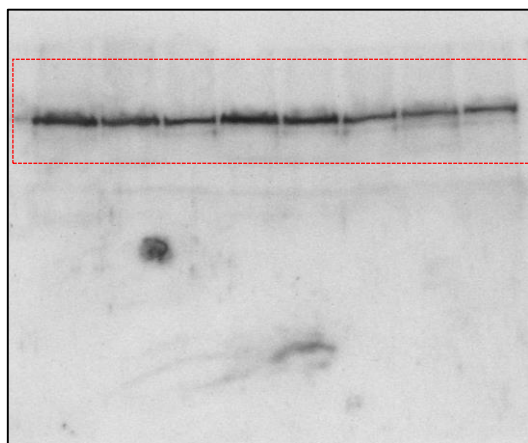

MFN1

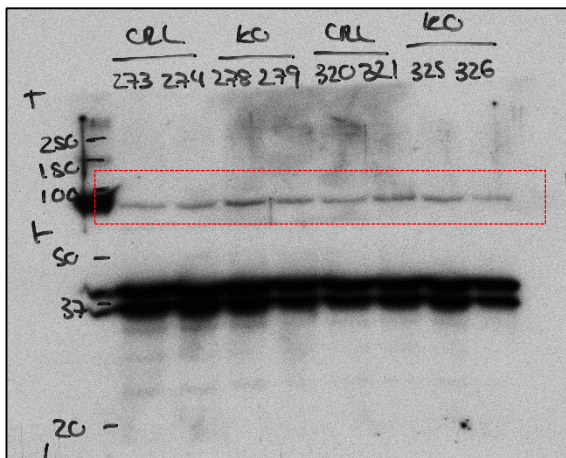

# Supplemental Material to Supplemental Fig S3h (original blots)

h

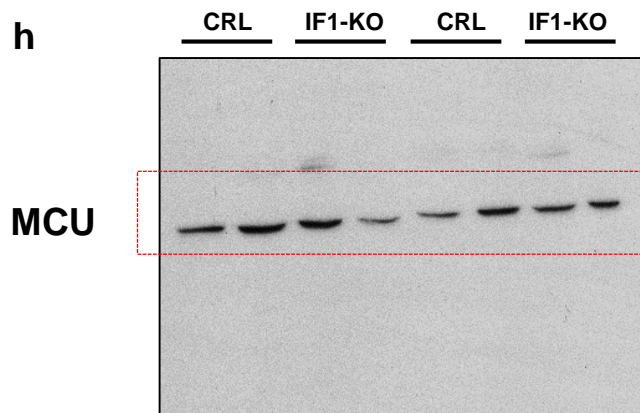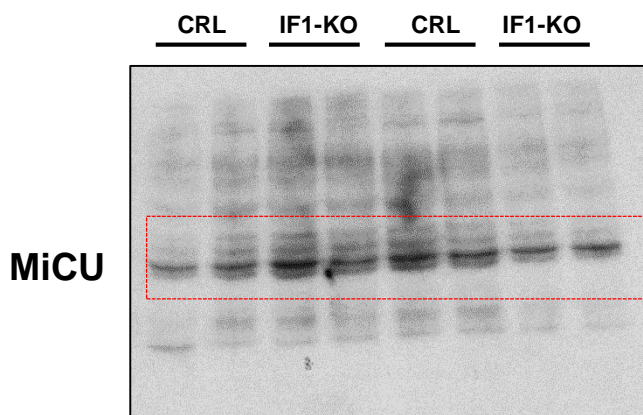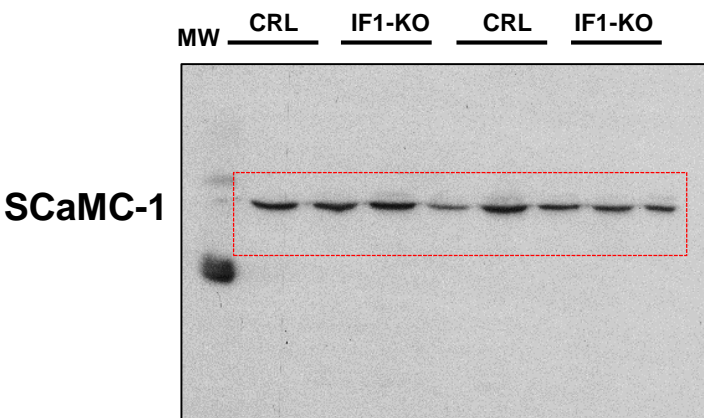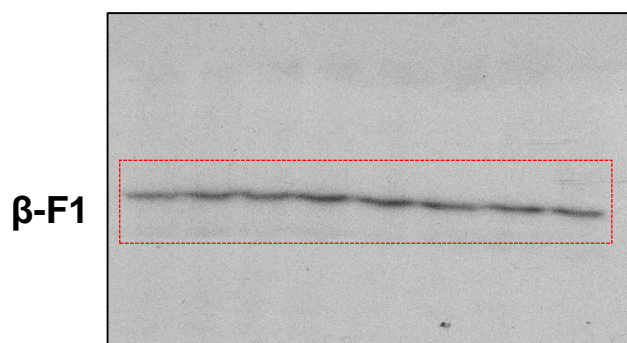

# Supplemental Material to Supplemental Fig S5f (original blots)

f

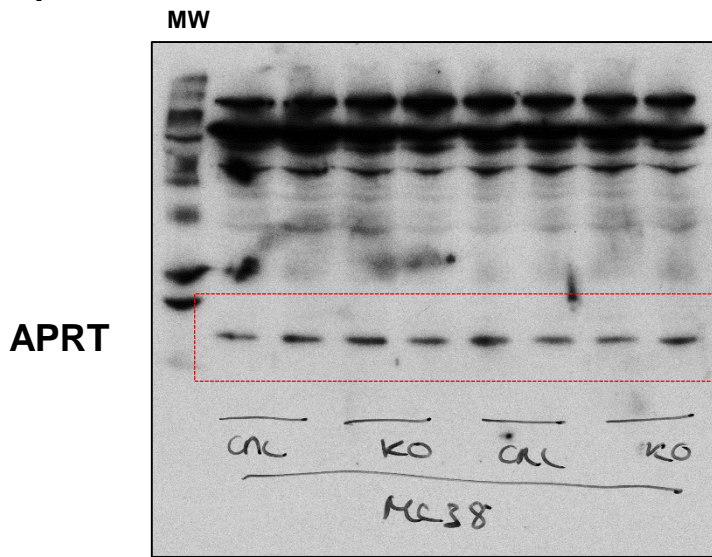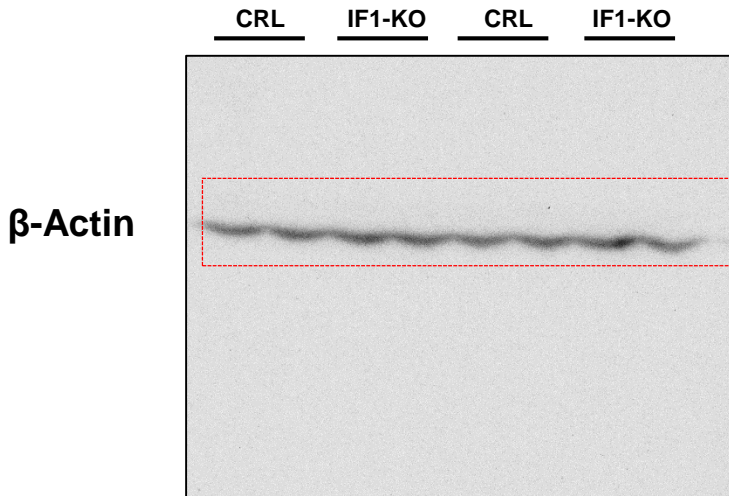

# Supplemental Material to Supplemental Fig S7b (original blots)

b

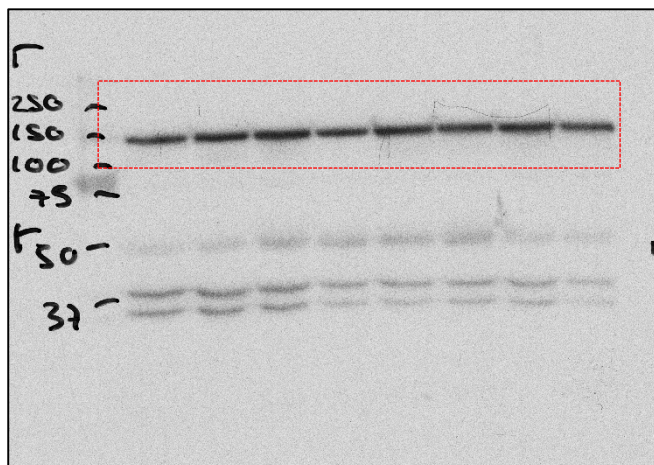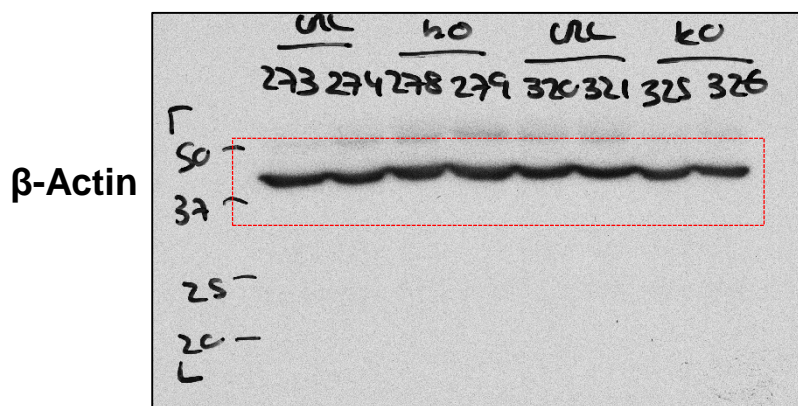

Supplement: 41419_2023_5957_MOESM1_ESM.pdf [file 41419_2023_5957_MOESM1_ESM.pdf]
